# Supplementary material for: Cell-type- and region-specific restriction of neurotropic flavivirus infection by viperin
Source: PubMed Central journal article supplement (PMC5856362; doi:10.1186/s12974-018-1119-3), 2018-03-15

Figure S1

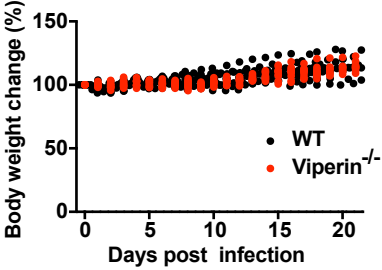

Supplement: 12974_2018_1119_MOESM1_ESM.pdf [file 12974_2018_1119_MOESM1_ESM.pdf]
