# Supplementary material for: Cell-type- and region-specific restriction of neurotropic flavivirus infection by viperin
Source: Springer Nature journal article supplement (doi:10.1186/s12974-018-1119-3), 2018-03-15

Figure S3

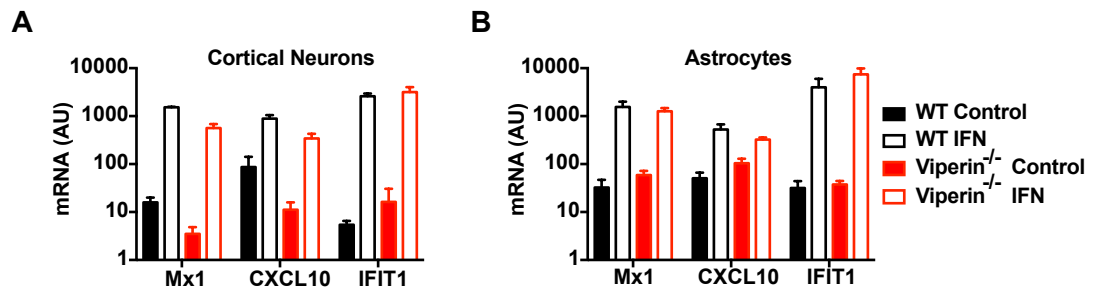

Supplement: MOESM3 [file 15538142]
